# Supplementary material for: Effect of smoking on physical and cognitive capability in later life: a multicohort study using observational and genetic approaches
Source: HighWire-hosted journal article supplement (doi:10.1136/bmjopen-2015-008393), 2015-12-01
Supplement: bmjopen-2015-008393supp.pdf [file bmjopen-2015-008393supp.pdf]

## SUPPLEMENTARY MATERIAL

Effect of smoking on physical and cognitive capability in later life: A multi-cohort study using observational and genetic approaches

Teri-Louise North<sup>\*1</sup>, Tom M. Palmer<sup>1,2,3</sup>, Sarah J. Lewis<sup>1</sup>, Rachel Cooper<sup>4</sup>, Chris Power<sup>5</sup>, Alison Pattie<sup>6</sup>, John M. Starr<sup>7</sup>, Ian J. Deary<sup>6,7</sup>, Richard M. Martin<sup>1,8</sup>, Avan Aihie Sayer<sup>9</sup>, Meena Kumari<sup>10,11</sup>, Cyrus Cooper<sup>9,12,13</sup>, Mika Kivimaki<sup>11</sup>, Diana Kuh<sup>4</sup>, Yoav Ben-Shlomo<sup>1</sup>, Ian N. M. Day<sup>1</sup>

<sup>1</sup>School of Social and Community Medicine, University of Bristol, UK

<sup>2</sup>Division of Health Sciences, Warwick Medical School, University of Warwick, UK

<sup>3</sup>Department of Mathematics and Statistics, Lancaster University, Lancaster, UK

<sup>4</sup>MRC Unit for Lifelong Health and Ageing at UCL, London, UK

<sup>5</sup>Population, Policy and Practice, UCL Institute of Child Health, University College London, UK

<sup>6</sup>Department of Psychology, University of Edinburgh, UK

<sup>7</sup>Centre for Cognitive Ageing and Cognitive Epidemiology, University of Edinburgh, UK

<sup>8</sup>University of Bristol / University Hospitals Bristol NHS Foundation Trust National Institute for Health Research Bristol Nutrition Biomedical Research Unit, University of Bristol, UK

<sup>9</sup>MRC Lifecourse Epidemiology Unit, University of Southampton, UK

<sup>10</sup>ISER, University of Essex, UK

<sup>11</sup>Department of Epidemiology and Public Health, UCL, London, UK

<sup>12</sup>National Institute for Health Research Nutrition Biomedical Research Centre, University of Southampton and University Hospital Southampton NHS Foundation Trust, UK

<sup>13</sup>National Institute for Health Research Musculoskeletal Biomedical Research Unit, University of Oxford, UK

\*Corresponding author:

Teri-Louise North

School of Social and Community Medicine

University of Bristol

Oakfield House

Oakfield Grove

Bristol

BS8 2BN

email: [teri.north.2005@my.bristol.ac.uk](mailto:teri.north.2005@my.bristol.ac.uk)

Wave of outcome assessment in this analysis

**Boyd Orr (BO)(1):** Physical capability measures were assessed at the third wave (2002-03).

**Caerphilly Prospective Study (CAPS) :** Cognitive function measures were assessed at phase III, with follow up measures to calculate decline taken from phase V. Physical capability measures were assessed at phase V.

**English Longitudinal Study of Ageing (ELSA)(2):** Physical and cognitive capability were assessed at wave 2 (2004/5). Follow up cognitive measures for decline calculations were taken from wave 5(2010/11).

**Hertfordshire Ageing Study (HAS) (3):** Cognitive function was assessed at wave 1 (1994/5) with follow up measures for decline taken from wave 2 (2003/05). Grip strength was assessed at wave 1 and all other physical capability measures at wave 2.

**Hertfordshire Cohort Study (HCS) (4):** Grip strength was assessed at wave 1 (1999-2004) while TUG speed, walk speed, balance ability and chair rise speed were assessed at both waves 1 (1999-2004) and 2 (2004/05) with partial overlap in some tests and no overlap in others. These latter measures were combined across waves, with priority given to wave 1, and the covariates tailored as such.

**Lothian Birth Cohort 1921 (LBC1921) (5):** Physical and cognitive capability were assessed at wave 1 age 79 years, with follow up cognitive capability measures for decline calculations taken from wave 3 age 87 years.

**National Child Development Study (NCDS) (6):** Cognitive capability was assessed at the 2008 follow up when the study members were 50 years old.

**MRC National Survey of Health and Development (NSHD) (7):** All cognitive capability measures were taken from the 1999 wave when the study members were 53 years, with follow up measures for cognitive decline taken when the study members were 60-64 years. All physical capability measures were taken from the 1999 wave with the exception of TUG, which was analysed when the study members were 60-64 years.

**Whitehall II Study (WHII) (8):** Walking speed was analysed at phase 7 (2002-04), while all cognitive outcomes were analysed at phase 5 (1997-99) with follow up measures taken from phase 7.

Analyses of the genotype-covariate and genotype-smoking associations took the covariate and smoking outcomes from the earliest wave at which they were analysed in the observational associations.

## Measures of physical capability

Details of the ascertainment and harmonisation of the five measures of physical capability used in analyses are described in detail elsewhere(9) and are summarised here. The approach to harmonise chair rise times (5 or 10 rises) was to calculate chair rise speed in the current study.

Grip strength was tested in ELSA, HAS, HCS, LBC AND NSHD using handheld dynamometers (the specific devices used in each study are described elsewhere (9)). The maximum measure was used in each study (extracted from 3 measures of each hand in ELSA, HAS and HCS, 3 measures of the dominant hand in LBC and 2 measures in each hand in NSHD). If repeat measures were missing the existing measures were used to derive the maximum.

Standing balance was assessed in BO, CaPS, ELSA, HAS, HCS and NSHD. Owing to the heterogeneity in the way the test was administered across cohorts, the outcome used in analyses was a derived binary variable for inability to balance on one leg with eyes open for five seconds. In ELSA the tests administered were more complex as described by Cooper *et al*(9) and we derived the outcome in the same way, namely, inability to balance in full tandem with eyes open for 5 seconds with individuals who were not progressed to the next phase of testing classed as unable. Individuals who did not complete the balance test for health reasons were classed as unable in all analyses. If tests were conducted more than once the best performance was used to derive the outcome variable.

The timed walk test was conducted in LBC (6 metres as fast as possible), HAS and HCS (3 metres at normal pace), ELSA (8 feet at normal pace with 2 trials) and WHII (8 feet at

normal pace with 3 trials). To normalise the distribution and to make a higher outcome a healthier outcome, times were converted to speeds in metres per second and then averaged where repeat trials were available.

The timed get up and go test was performed in BO, HAS, HCS, CaPS and NSHD. In all cohorts, study members had to rise from a chair, walk 3 metres at a normal pace and return to a seated position in the chair. The test was repeated in BO and CaPS. Again all times were converted to speeds in metres per second and then averaged where the trial was conducted more than once.

Timed chair rises were assessed in HAS, HCS, ELSA and NSHD. All times were converted to chair rise speed in stands per second. The cohorts measured time to complete 5 or 10 chair rises as fast as possible. In ELSA, individuals under 69 years performed 10 rises while those aged 70 and over performed 5 rises. Time to complete 5 rises was measured in both age groups and this was used to derive chair rise speed.

Some physical performance measures were conducted in part of the HCS cohort in one wave and in the remaining cohort in a later wave. To maximise sample size, measures were pooled across waves and covariates were tailored according to the wave at which the outcome had been performed.

### Measures of cognitive capability

The measures of cognition across the HALCYon cohorts were categorised into measures of crystallised ability and measures of fluid cognition.

#### *Measures of crystallised cognitive function*

The National Adult Reading Test (NART)(10) was available in LBC, CaPS and NSHD. This requires study members to read aloud 50 words with irregular pronunciation and the number of words pronounced correctly is used in analyses here. NART should reflect pre-morbid IQ.

The Mill Hill vocabulary test(11) was administered in HAS and WHII. Study members had to choose the correct synonym for 33 words out of 6 multiple choice answers with increasing difficulty. The number of correct answers is used in analyses.

#### *Measures of fluid cognitive function*

Semantic fluency was tested in ELSA, NSHD, NCDS and WHII via a verbal or written test where study members were asked to name as many animals as possible in 1 minute. The number of unique animals named were used in analyses.

Verbal memory was tested in ELSA, NSHD, NCDS and WHII via a word recall test. The numbers of words correctly recalled was used in analyses. In NSHD, we summed the total score for remembering the same 15 words in writing over three consecutive trials. The sum of two trials with a delay for the second trial for remembering 10 words verbally was analysed in ELSA and NCDS. 20 words were recalled in writing in WHII.

Phonemic fluency was analysed in LBC and WHII. In LBC, study members were given three 1 minute trials to name as many words as possible beginning with F, L and C. The total

number of words is used in analyses. In WHII, study members wrote as many words as possible in 1 minute beginning with S.

Search speed was tested in ELSA (780 letters), NSHD (600 letters) and NCDS (780 letters) whereby participants must cross out particular letters in a large grid of letters. The number of letters searched per minute was used in analyses.

The Alice Heim 4-I test (AH4)(12) was available for analyses in CaPS, HAS and WHII. This involves 65 verbal and mathematical questions. The total score achieved in 10 minutes was used in analyses here.

Choice reaction time was assessed in CaPS via a computer test in which the study members had to press one of four key pads depending on which box a stimulus appeared in on screen.

Wechsler logical memory(13) was tested in LBC. The participants were asked to recall two stories immediately and following a delay for each. The total sum of the scores for each story were progressed to analysis.

Raven's Progressive Matrices(14) were used in LBC, in which study members were given 20 minutes to complete 60 multiple choice "complete the pattern" questions. The total score was used in the analysis.

#### *Deriving a score for General Fluid Ability (Gf)*

Where available, three fluid cognitive measures were included from each cohort to produce the factor. These were semantic fluency, AH4 and inverse transformed FCRT in CaPS; word recall, semantic fluency and natural log transformed search speed in NSHD and ELSA;



semantic fluency, ravens progressive matrices and logical memory in LBC; semantic fluency, word recall and AH4 in WHII.

### Derivation of covariates

Disease status was defined as a binary variable. Individuals were assigned “case” status if they had a history of heart disease, stroke or diabetes. The definition of a case varied across cohorts depending on the availability of information. The numbers of cases by cohort are described in Supplementary Table 2.

Socio-economic position was classified according to the Registrar-General’s Social Classes (RGSC) system and included in analyses as a categorical variable. This is based on a study member’s current or most recent occupation. Individuals who did not have information were coded as missing while individuals with occupations beyond the classification system were coded in an “unclassifiable” category. As the classification differed across cohorts slightly, to assess the association between genotype and socio-economic position to test the Mendelian Randomization assumptions, individuals who had a valid RGSC coding (I-V) were binarised into Professional & Managerial or other.

Individuals aged 90 years or over are not assigned an exact age in ELSA data releases. As such, we estimated the age of these individuals using a representative estimate of the mean age of individuals aged 90 and over in England and Wales in 2005 (the year of wave 2 assessment). To calculate this estimate, we used the England and Wales Mid-Year Population Estimates of the Very Elderly, 2002-2010, demographic table “Mid-2010 Estimates of the very elderly (including centenarians) England and Wales; estimated resident population” which was part of the Population Estimates of the Very Elderly, 2010 Office for National Statistics release (release date 29 September 2011, date accessed 5 February 2014 from <http://www.ons.gov.uk/ons/publications/re-reference-tables.html?edition=tcm%3A77-223697>). The estimated age used in analyses was 92.62 years.

## Genotyping

The rs16969968 SNP was genotyped by KBioscience (<http://www.lgcgenomics.com/>) in CaPS, BO, HCS, HAS, ELSA and WHII. In LBC, the genotype data came from the Illumina 610-Quadv1 array (rs1051730) and in NCDS from a combination of the T1DGC(15) array (rs1051730) and the WTCCC2 array (rs16969968, Illumina 1.2M chip). The rs16969968 and the rs1051730 SNPs are used interchangeably and thus genotypes from these SNPs were pooled for the NCDS analysis. Genotype data for rs16969968 in NSHD came from a previous genotyping performed by KBioscience. For SNPs genotyped by HALCYon, call rate, clustering and duplicate concordance were examined where possible. Departures from HWE and MAF were examined in all cohorts. The whole analysis was restricted to unrelated individuals of European ancestry where this information was available. Further information on the genotyping quality is provided in Supplementary Table 1.

Supplementary Table 1: Genotype Quality

| Cohort | SNP        | Call Rate (%) | Duplicate Concordance Rate (%) |
|--------|------------|---------------|--------------------------------|
| BO     | rs16969968 | 97.50         | 97.87                          |
| CaPS   | rs16969968 | 98.04         | 100                            |
| ELSA   | rs16969968 | 99.38         | 99.76                          |
| HAS    | rs16969968 | 94.79         | Not available                  |
| HCS    | rs16969968 | 97.06         | Not available                  |
| LBC    | rs1051730  | NA            | NA                             |
| NCDSa* | rs16969968 | NA            | NA                             |
| NCDSb* | rs1051730  | NA            | NA                             |
| NSHD   | rs16969968 | NA            | NA                             |
| WHII   | rs16969968 | 98.48         | 97.12                          |

Notes:

\*In NCDS we analysed a combination of the rs16969968 and the rs1051730 genotype depending on availability. As these SNPs are used interchangeably, each individual was classified according to their number of minor alleles of either SNP

Supplementary Table 2: Disease status by cohort

| Cohort | % Individuals classed as a case |
|--------|---------------------------------|
| BO     | 29.14                           |
| CaPS   | 42.25                           |
| ELSA   | 19.94                           |
| HAS    | 23.75                           |
| HCS    | 15.33                           |
| LBC    | 35.51                           |
| NCDS   | 2.66                            |
| NSHD   | 8.14                            |
| WHII   | 10.31                           |

Notes:

Based on individuals included in the observational analysis using the earliest wave analysed to calculate %

Supplementary Table 3: Genotype frequencies by cohort

| Cohort | C/C   | C/T  | T/T  | HWE<br>p-value** | Total |
|--------|-------|------|------|------------------|-------|
| BO     | 214   | 198  | 42   | 0.69             | 454   |
| CaPS   | 593   | 569  | 125  | 0.50             | 1287  |
| ELSA   | 2494  | 2404 | 589  | 0.79             | 5487  |
| HAS    | 214   | 235  | 68   | 0.78             | 517   |
| HCS    | 1191  | 1211 | 310  | 0.93             | 2712  |
| LBC*   | 231   | 239  | 43   | 0.08             | 513   |
| NCDS*  | 2099  | 2133 | 566  | 0.50             | 4798  |
| NSHD   | 1222  | 1164 | 255  | 0.36             | 2641  |
| WHII   | 1747  | 1750 | 423  | 0.62             | 3920  |
| TOTAL  | 10005 | 9903 | 2421 | 0.73             | 22329 |

*Notes:*

Numbers based on all individuals with age, sex, smoking status and genotype. The earliest cohort phase or wave utilised in the analyses was used to extract data, and to perform the meta-analysis in Figures 1-4 (main paper)

\*Cohort analysis uses rs1051730 as a proxy. NCDS analysis combines rs16969968 with rs1051730. Results represent pooled SNPs here.

\*\*Based on chi-squared test with 1 degree of freedom

Supplementary Table 4: Observational sample size by outcome and cohort (Model M1)

|                                              | BO      | CaPS      | ELSA      | HAS     | HCS       | LBC     | NCDS       | NSHD      | WHII      |
|----------------------------------------------|---------|-----------|-----------|---------|-----------|---------|------------|-----------|-----------|
| Grip strength                                | 0       | 0         | 5374(587) | 635(87) | 2803(239) | 536(35) | 0          | 2831(645) | 0         |
| Chair rise speed                             | 0       | 0         | 4654(490) | 244(16) | 1516(105) | 0       | 0          | 2721(608) | 0         |
| Walk speed                                   | 0       | 0         | 3442(312) | 260(16) | 2176(167) | 534(35) | 0          | 0         | 5319(278) |
| TUG speed                                    | 279(33) | 999(123)  | 0         | 263(16) | 2180(168) | 0       | 0          | 1849(189) | 0         |
| Inability to<br>balance on one<br>leg for 5s | 279(33) | 1002(124) | 5385(589) | 265(17) | 1569(106) | 0       | 0          | 2860(648) | 0         |
| Mill Hill                                    | 0       | 0         | 0         | 633(86) | 0         | 0       | 0          | 0         | 4563(354) |
| NART                                         | 0       | 1804(479) | 0         | 0       | 0         | 540(36) | 0          | 2812(646) | 0         |
| Gf                                           | 0       | 1698(450) | 5306(582) | 0       | 0         | 531(35) | 0          | 2856(653) | 4486(348) |
| AH4                                          | 0       | 1798(482) | 0         | 621(85) | 0         | 0       | 0          | 0         | 4552(357) |
| Semantic fluency                             | 0       | 1820(485) | 5418(594) | 0       | 0         | 0       | 7652(1570) | 2928(674) | 4537(353) |
| Phonemic fluency                             | 0       | 0         | 0         | 0       | 0         | 538(35) | 0          | 0         | 4543(353) |
| Search speed                                 | 0       | 0         | 5306(582) | 0       | 0         | 0       | 7521(1538) | 2918(672) | 0         |
| Word recall                                  | 0       | 0         | 5411(591) | 0       | 0         | 0       | 7600(1565) | 2866(655) | 4541(355) |
| Four choice<br>reaction time                 | 0       | 1722(459) | 0         | 0       | 0         | 0       | 0          | 0         | 0         |
| Logical memory                               | 0       | 0         | 0         | 0       | 0         | 540(36) | 0          | 0         | 0         |
| Raven's<br>Progressive<br>Matrices           | 0       | 0         | 0         | 0       | 0         | 536(36) | 0          | 0         | 0         |
| Mill Hill decline                            | 0       | 0         | 0         | 228(20) | 0         | 0       | 0          | 0         | 4510(350) |
| NART decline                                 | 0       | 1021(218) | 0         | 0       | 0         | 202(8)  | 0          | 0         | 0         |
| AH4 decline                                  | 0       | 1003(211) | 0         | 254(20) | 0         | 0       | 0          | 0         | 4505(353) |
| Semantic fluency<br>decline                  | 0       | 1044(224) | 3713(380) | 0       | 0         | 0       | 0          | 0         | 4484(349) |
| Phonemic fluency<br>decline                  | 0       | 0         | 0         | 0       | 0         | 203(7)  | 0          | 0         | 4478(349) |
| Search speed<br>decline                      | 0       | 0         | 0         | 0       | 0         | 0       | 0          | 2055(383) | 0         |
| Word recall<br>decline                       | 0       | 0         | 3714(380) | 0       | 0         | 0       | 0          | 2005(372) | 4482(351) |
| Four choice<br>reaction time<br>decline      | 0       | 960(202)  | 0         | 0       | 0         | 0       | 0          | 0         | 0         |
| Logical memory<br>decline                    | 0       | 0         | 0         | 0       | 0         | 204(8)  | 0          | 0         | 0         |
| Raven's<br>Progressive<br>Matrices decline   | 0       | 0         | 0         | 0       | 0         | 198(8)  | 0          | 0         | 0         |

Notes: Numbers based on all individuals with age, sex, socio-economic position and the outcome measure. Numbers with smoking status are provided with numbers with CPD in brackets. Smoking status was analysed as binary variables in separate analyses comparing classes of smoker. Some regressions were not possible due to small sample size, and on some occasions individuals were removed from the analysis automatically by the software

Supplementary Table 5: Genetic sample size by outcome and cohort

|                                        | BO             | CaPS             | ELSA               | HAS            | HCS                | LBC            | NCDS               | NSHD              | WHII               |
|----------------------------------------|----------------|------------------|--------------------|----------------|--------------------|----------------|--------------------|-------------------|--------------------|
| Grip strength                          | 0              | 0                | 764(587)/2647/1963 | 85(74)/233/143 | 324(224)/1090/1234 | 32(32)/252/223 | 0                  | 593(588)/1200/727 | 0                  |
| Chair rise speed                       | 0              | 0                | 634(490)/2279/1741 | 18(15)/101/54  | 126(96)/560/736    | 0              | 0                  | 558(554)/1154/712 | 0                  |
| Walk speed                             | 0              | 0                | 412(312)/1774/1256 | 19(15)/107/57  | 207(154)/828/1019  | 32(32)/251/222 | 0                  | 0                 | 495(214)/1877/1854 |
| TUG speed                              | 40(30)/108/106 | 129(91)/409/144  | 0                  | 19(15)/109/58  | 208(155)/829/1021  | 0              | 0                  | 171(167)/914/517  | 0                  |
| Inability to balance on one leg for 5s | 40(30)/108/106 | 131(93)/411/146  | 768(589)/2643/1974 | 19(15)/109/59  | 127(97)/579/764    | 0              | 0                  | 596(591)/1212/737 | 0                  |
| Mill Hill                              | 0              | 0                | 0                  | 84(73)/232/143 | 0                  | 0              | 0                  | 0                 | 512(279)/1427/1656 |
| NART                                   | 0              | 406(314)/571/203 | 0                  | 0              | 0                  | 33(33)/253/223 | 0                  | 591(586)/1191/719 | 0                  |
| Gf                                     | 0              | 386(297)/542/191 | 759(582)/2617/1930 | 0              | 0                  | 32(32)/248/222 | 0                  | 599(594)/1206/738 | 506(273)/1406/1622 |
| AH4                                    | 0              | 407(314)/569/201 | 0                  | 84(73)/225/143 | 0                  | 0              | 0                  | 0                 | 515(282)/1423/1647 |
| Semantic fluency                       | 0              | 410(317)/576/203 | 775(594)/2665/1978 | 0              | 0                  | 0              | 960(957)/1516/2179 | 616(611)/1235/750 | 511(278)/1416/1648 |
| Phonemic fluency                       | 0              | 0                | 0                  | 0              | 0                  | 32(32)/251/224 | 0                  | 0                 | 511(278)/1419/1650 |
| Search speed                           | 0              | 0                | 759(582)/2617/1930 | 0              | 0                  | 0              | 938(935)/1488/2140 | 614(609)/1232/748 | 0                  |
| Word recall                            | 0              | 0                | 771(591)/2664/1976 | 0              | 0                  | 0              | 959(956)/1505/2162 | 601(596)/1209/742 | 513(280)/1426/1641 |
| Four choice reaction time              | 0              | 391(302)/550/195 | 0                  | 0              | 0                  | 0              | 0                  | 0                 | 0                  |
| Logical memory                         | 0              | 0                | 0                  | 0              | 0                  | 33(33)/252/224 | 0                  | 0                 | 0                  |
| Raven's Progressive Matrices           | 0              | 0                | 0                  | 0              | 0                  | 33(33)/252/222 | 0                  | 0                 | 0                  |
| Mill Hill decline                      | 0              | 0                | 0                  | 19(15)/88/55   | 0                  | 0              | 0                  | 0                 | 506(276)/1417/1633 |
| NART decline                           | 0              | 228(168)/359/151 | 0                  | 0              | 0                  | 6(6)/92/94     | 0                  | 0                 | 0                  |
| AH4 decline                            | 0              | 217(161)/360/147 | 0                  | 19(15)/99/62   | 0                  | 0              | 0                  | 0                 | 509(279)/1413/1630 |
| Semantic fluency decline               | 0              | 232(172)/369/153 | 492(380)/1785/1436 | 0              | 0                  | 0              | 0                  | 0                 | 505(275)/1405/1625 |
| Phonemic fluency decline               | 0              | 0                | 0                  | 0              | 0                  | 5(5)/92/96     | 0                  | 0                 | 505(275)/1405/1619 |



|                                      |   |                  |                    |   |   |            |   |                  |                    |
|--------------------------------------|---|------------------|--------------------|---|---|------------|---|------------------|--------------------|
| Search speed decline                 | 0 | 0                | 0                  | 0 | 0 | 0          | 0 | 360(356)/930/561 | 0                  |
| Word recall decline                  | 0 | 0                | 492(380)/1786/1436 | 0 | 0 | 0          | 0 | 350(346)/907/550 | 506(276)/1412/1618 |
| Four choice reaction time decline    | 0 | 213(158)/345/142 | 0                  | 0 | 0 | 0          | 0 | 0                | 0                  |
| Logical memory decline               | 0 | 0                | 0                  | 0 | 0 | 6(6)/92/96 | 0 | 0                | 0                  |
| Raven's Progressive Matrices decline | 0 | 0                | 0                  | 0 | 0 | 6(6)/90/92 | 0 | 0                | 0                  |

Notes: Numbers based on all individuals with age, sex, genotype, smoking status and the outcome measure, and are restricted to those also in the observational analysis. Numbers provided are current smokers (number with CPD)/ex smokers/never smokers. Numbers reflect the data progressed to regression analyses, irrespective of whether the regression was possible.

Supplementary Table 6: Observational estimates for the associations between smoking and cognitive capabilities - single cohort analyses

| Outcome                            | Cohort | Model <sup>ψ</sup> | Cigarette per day<br>β (95% CI) | Current vs. ex smoker<br>β (95% CI) | Current vs. never<br>smoker<br>β (95% CI) | Ever vs. never smoker<br>β (95% CI) |
|------------------------------------|--------|--------------------|---------------------------------|-------------------------------------|-------------------------------------------|-------------------------------------|
| Four choice<br>reaction<br>time#   | CaPS   | M1                 | 0.008(-0.002,0.017)             | -0.159**(-0.260,-0.058)             | -0.050(-0.185,0.085)                      | 0.044(-0.074,0.162)                 |
|                                    |        | M2                 | 0.007(-0.004,0.017)             | -0.203***(-0.310,-0.096)            | -0.063(-0.210,0.083)                      | 0.061(-0.069,0.190)                 |
| Logical<br>memory                  | LBC    | M1                 | 0.023(-0.049,0.095)             | 0.138(-0.220,0.496)                 | 0.192(-0.161,0.545)                       | 0.031(-0.140,0.202)                 |
|                                    |        | M2                 | 0.024(-0.049,0.098)             | 0.123(-0.240,0.485)                 | 0.185(-0.170,0.540)                       | 0.037(-0.137,0.210)                 |
| Raven's<br>progressive<br>matrices | LBC    | M1                 | -0.015(-0.081,0.051)            | -0.160(-0.501,0.180)                | -0.094(-0.426,0.237)                      | 0.009(-0.155,0.173)                 |
|                                    |        | M2                 | -0.011(-0.077,0.056)            | -0.163(-0.507,0.181)                | -0.086(-0.420,0.248)                      | 0.009(-0.157,0.175)                 |

*Notes:*

<sup>ψ</sup>Models: (M1) age, sex and SEP adjusted, (M2) M1 + disease adjusted

#Inverse transformed

\*p<0.05, \*\*p<0.01, \*\*\*p<0.001, \*\*\*\*p<0.0001

Supplementary Table 7: Observational estimates for the associations between smoking and measures of cognitive decline.

| Outcome        | Model $\psi$     | Cigarette per day<br>OR (95% CI) | Current vs. ex smoker<br>OR (95% CI) | Current vs. never smoker<br>OR (95% CI) | Ever vs. never smoker<br>OR (95% CI) |                    |
|----------------|------------------|----------------------------------|--------------------------------------|-----------------------------------------|--------------------------------------|--------------------|
| Crystallized   | Mill Hill        | M1                               | 1.003(0.980,1.027)                   | 1.002(0.691,1.452)                      | 1.121(0.915,1.375)                   | 1.099(0.961,1.258) |
|                |                  | M2                               | 1.004(0.980,1.028)                   | 0.997(0.666,1.491)                      | 1.117(0.911,1.371)                   | 1.100(0.960,1.259) |
|                | NART             | M1                               | 0.993(0.961,1.027) <sup>##</sup>     | 1.065(0.786,1.443)                      | 1.134(0.777,1.655)                   | 1.008(0.752,1.353) |
|                |                  | M2                               | 0.998(0.962,1.036) <sup>##</sup>     | 1.030(0.742,1.430)                      | 1.183(0.781,1.792)                   | 1.053(0.765,1.451) |
| Fluid Measures | AH4              | M1                               | 0.998(0.979,1.017)                   | 1.265*(1.047,1.527)                     | 1.271(0.746,2.165)                   | 1.058(0.778,1.439) |
|                |                  | M2                               | 0.996(0.977,1.016)                   | 1.283**(1.076,1.531)                    | 1.370(0.806,2.328)                   | 1.120(0.870,1.442) |
|                | Semantic fluency | M1                               | 1.019(0.992,1.046)                   | 1.090(0.912,1.302)                      | 1.167(0.883,1.544)                   | 1.068(0.939,1.215) |
|                |                  | M2                               | 1.023(0.992,1.056)                   | 1.092(0.924,1.290)                      | 1.188(0.898,1.573)                   | 1.071(0.937,1.225) |
|                | Phonemic fluency | M1                               | 1.003(0.979,1.028) <sup>#</sup>      | 1.042(0.843,1.286)                      | 0.990(0.805,1.218)                   | 0.973(0.851,1.112) |
|                |                  | M2                               | 1.002(0.978,1.027) <sup>#</sup>      | 1.038(0.840,1.283)                      | 0.993(0.808,1.222)                   | 0.984(0.860,1.125) |
|                | Word recall      | M1                               | 0.997(0.969,1.026)                   | 1.233**(1.077,1.412)                    | 1.219**(1.061,1.401)                 | 1.020(0.898,1.157) |
|                |                  | M2                               | 0.997(0.969,1.025)                   | 1.230**(1.074,1.409)                    | 1.213**(1.055,1.395)                 | 1.021(0.893,1.167) |

Notes:

$\psi$ Models: (M1) age, sex and SEP adjusted, (M2) M1 + disease adjusted

\*p<0.05, \*\*p<0.01, \*\*\*p<0.001, \*\*\*\*p<0.0001

#analysis in WHI only

##analysis in CAPS only

Supplementary Table 8: Observational estimates for the associations between smoking and measures of cognitive decline - single cohort analyses

| Outcome                               | Cohort | Model $\psi$ | Cigarette per day<br>OR (95% CI) | Current vs. ex smoker<br>OR (95% CI) | Current vs. never<br>smoker<br>OR (95% CI) | Ever vs. never smoker<br>OR (95% CI) |
|---------------------------------------|--------|--------------|----------------------------------|--------------------------------------|--------------------------------------------|--------------------------------------|
| Search speed                          | NSHD   | M1           | 1.001(0.978,1.025)               | 1.364*(1.043,1.784)                  | 1.170(0.871,1.571)                         | 0.934(0.751,1.161)                   |
|                                       |        | M2           | 1.005(0.982,1.029)               | 1.359*(1.039,1.777)                  | 1.174(0.874,1.577)                         | 0.938(0.754,1.166)                   |
| Four choice<br>reaction time $\gamma$ | CaPS   | M1           | 1.021(0.990,1.054)               | 1.825***(1.295,2.572)                | 1.742*(1.128,2.690)                        | 1.125(0.774,1.635)                   |
|                                       |        | M2           | 1.017(0.981,1.054)               | 1.854***(1.281,2.684)                | 1.742*(1.082,2.803)                        | 1.111(0.737,1.676)                   |
| Logical<br>memory                     | LBC    | M1           | #                                | 0.427(0.046,3.982)                   | 0.409(0.046,3.650)                         | 1.118(0.576,2.172)                   |
|                                       |        | M2           | #                                | 0.419(0.044,4.026)                   | 0.393(0.043,3.588)                         | 1.236(0.624,2.448)                   |
| Raven's<br>progressive<br>matrices    | LBC    | M1           | #                                | 1.325(0.285,6.165)                   | 2.668(0.545,13.052)                        | 2.128*(1.074,4.219)                  |
|                                       |        | M2           | #                                | 1.187(0.250,5.644)                   | 2.990(0.588,15.191)                        | 2.322*(1.153,4.677)                  |

*Notes:*

$\psi$ Models: (M1) age, sex and SEP adjusted, (M2) M1 + disease adjusted

#Analysis not possible due to small sample size

$\gamma$ Decline in four choice reaction time was calculated using the bottom 25% decliners so that the outcome represents decline in cognitive ability over time

\*p<0.05, \*\*p<0.01, \*\*\*p<0.001, \*\*\*\*p<0.0001

Supplementary Table 9: Association between rs16969968 and covariates

| Covariate                                               | Effect (95% CI)      | I <sup>2</sup> (p-value <sup>τ</sup> ) |
|---------------------------------------------------------|----------------------|----------------------------------------|
| Age (years)                                             | -0.000(-0.010,0.010) | 0.00(0.455)                            |
| BMI                                                     | -0.019(-0.139,0.101) | 20.82(0.264)                           |
| Height (cm)                                             | -0.003(-0.203,0.197) | 0.00(0.957)                            |
| Sex                                                     | 1.016(0.974,1.059)   | 0.00(0.600)                            |
| Disease status                                          | 1.029(0.971,1.092)   | 0.00(0.935)                            |
| SEP (binary RGSC codes I or II versus RGSC codes III-V) | 1.031(0.987,1.077)   | 0.00(0.984)                            |

Effect sizes are regression coefficients for continuous outcome measures and odds ratios for binary measures.  
 $\tau$ : I<sup>2</sup> is the percentage of the variation across studies that is due to heterogeneity rather than chance(16). The p-value is for Cochran's Q statistic.

Supplementary Table 10: Associations between rs16969968 and outcomes stratified by smoking status - single cohort analyses

| Outcome Category             | Outcome                            | Cohort | Current smokers<br>$\beta$ (95% CI) | Never smokers<br>$\beta$ (95% CI) | Ever smokers<br>$\beta$ (95% CI) |
|------------------------------|------------------------------------|--------|-------------------------------------|-----------------------------------|----------------------------------|
| Cognitive capability         | Four choice reaction time##        | CaPS   | 0.053(-0.097,0.204)                 | -0.068(-0.283,0.148)              | 0.031(-0.065,0.127)              |
|                              | Logical memory                     | LBC    | 0.240(-0.547,1.027)                 | 0.095(-0.116,0.305)               | 0.125(-0.062,0.313)              |
|                              | Raven's progressive matrices       | LBC    | 0.375(-0.360,1.111)                 | -0.124(-0.328,0.080)              | -0.010(-0.193,0.174)             |
|                              |                                    |        | Current smokers<br>OR (95% CI)      | Never smokers<br>OR (95% CI)      | Ever smokers<br>OR (95% CI)      |
| Cognitive capability decline | Search speed                       | NSHD   | 1.029(0.712,1.486)                  | 0.997(0.747,1.330)                | 1.003(0.824,1.222)               |
|                              | Four choice reaction time $\gamma$ | CaPS   | 1.736*(1.131,2.664)                 | 1.008(0.528,1.924)                | 1.263(0.945,1.690)               |
|                              | Logical memory                     | LBC    | #                                   | 1.541(0.720,3.297)                | 1.630(0.759,3.500)               |
|                              | Raven's progressive matrices       | LBC    | #                                   | 1.057(0.425,2.630)                | 1.401(0.696,2.821)               |

*Notes:*

#Analysis not possible due to small sample size

##Inverse transformed

$\gamma$ Decline in four choice reaction time was calculated using the bottom 25% decliners so that the outcome represents decline in cognitive ability over time

\* $p < 0.05$ , \*\* $p < 0.01$ , \*\*\* $p < 0.001$ , \*\*\*\* $p < 0.0001$

Models adjusted for age and sex.

Supplementary Table 11: Comparison of observational with instrumental variable estimates -  
single cohorts analyses

| Observational association of interest |                                  |        | Observational estimate, $\beta_o$<br>(95% CI) | IV estimate, $\beta_{IV}$<br>(95% CI) |
|---------------------------------------|----------------------------------|--------|-----------------------------------------------|---------------------------------------|
| Smoking<br>behaviour                  | Outcome                          | Cohort |                                               |                                       |
| Current vs ex<br>smoker               | Four choice<br>reaction<br>time# | CaPS   | -0.159**(-0.260,-0.058)                       | -11.376(-212.414,189.661)             |

Notes: IV: instrumental variable;

As explained in the methods, sample used to calculate observed and IV estimates differs according to the availability of variables

#Inverse transformed

\*p<0.05, \*\*p<0.01, \*\*\*p<0.001, \*\*\*\*p<0.0001

## Heterogeneity statistics for meta-analysed estimates

Supplementary Table 12: Heterogeneity statistics for the observational estimates for the associations between smoking and physical capabilities (Table 2, main paper)

| Outcome                                | Model $\psi$ | $I^2$ (p-value $\tau$ )    |                       |                          |                       |
|----------------------------------------|--------------|----------------------------|-----------------------|--------------------------|-----------------------|
|                                        |              | Cigarette per day $\delta$ | Current vs. ex smoker | Current vs. never smoker | Ever vs. never smoker |
| Grip strength                          | M1           | 0.00(0.576)                | 1.27(0.399)           | 57.83(0.050)             | 60.15(0.040)          |
|                                        | M2           | 0.00(0.710)                | 0.00(0.584)           | 54.30(0.068)             | 54.34(0.067)          |
|                                        | M3           | 0.00(0.684)                | 0.00(0.871)           | 34.55(0.191)             | 53.93(0.070)          |
| Chair rise speed                       | M1           | 0.00(0.766)                | 30.01(0.232)          | 30.07(0.232)             | 0.00(0.403)           |
|                                        | M2           | 0.00(0.997)                | 22.13(0.278)          | 38.10(0.183)             | 18.51(0.298)          |
|                                        | M3           | 0.00(0.757)                | 20.50(0.287)          | 45.16(0.140)             | 5.02(0.368)           |
| Walk speed                             | M1           | 37.14(0.174)               | 62.67(0.030)          | 36.02(0.181)             | 0.00(0.908)           |
|                                        | M2           | 17.97(0.300)               | 59.21(0.044)          | 29.22(0.227)             | 0.00(0.868)           |
|                                        | M3           | 56.98(0.054)               | 66.38(0.018)          | 57.23(0.053)             | 0.00(0.764)           |
| TUG speed                              | M1           | 12.17(0.336)               | 6.29(0.371)           | 0.00(0.901)              | 57.69(0.051)          |
|                                        | M2           | 9.21(0.354)                | 0.00(0.740)           | 0.00(0.931)              | 52.83(0.076)          |
|                                        | M3           | 47.16(0.109)               | 0.00(0.791)           | 0.00(0.994)              | 29.08(0.228)          |
| Inability to balance on one leg for 5s | M1           | 0.00(0.683)                | 0.00(0.672)           | 19.26(0.288)             | 0.00(0.709)           |
|                                        | M2           | 0.00(0.673)                | 0.00(0.833)           | 0.00(0.423)              | 0.00(0.730)           |
|                                        | M3           | 0.00(0.778)                | 0.00(0.836)           | 13.18(0.330)             | 0.00(0.611)           |

*Notes:*  
 $\psi$ Models: (M1) age, sex and SEP adjusted, (M2) M1 + disease adjusted, (M3) M2 + height, BMI adjusted  
 $\delta$ Association is for 1 CPD for comparison with genotypic analysis  
 $\tau$   $I^2$  is the percentage of the variation across studies that is due to heterogeneity rather than chance(16). The p-value is for Cochran's Q statistic.



Table 13: Heterogeneity statistics for the observational estimates for the associations between smoking and cognitive capabilities (Table 3, main paper)

| Outcome               | Model $\psi$     | $I^2$ (p-value $\tau^2$ ) |                       |                          |                       |              |
|-----------------------|------------------|---------------------------|-----------------------|--------------------------|-----------------------|--------------|
|                       |                  | Cigarette per day         | Current vs. ex smoker | Current vs. never smoker | Ever vs. never smoker |              |
| Crystallized measures | Mill Hill        | M1                        | 0.00(0.871)           | 0.00(0.737)              | 0.00(0.686)           | 0.00(0.355)  |
|                       |                  | M2                        | 0.00(0.840)           | 0.00(0.871)              | 0.00(0.555)           | 0.00(0.323)  |
|                       | NART             | M1                        | 0.00(0.942)           | 38.31(0.198)             | 35.77(0.211)          | 0.00(0.897)  |
|                       |                  | M2                        | 0.00(0.951)           | 13.95(0.313)             | 45.40(0.160)          | 0.00(0.856)  |
| Fluid Measures        | Gf               | M1                        | 72.99(0.005)          | 23.31(0.266)             | 34.84(0.189)          | 0.00(0.721)  |
|                       |                  | M2                        | 70.30(0.009)          | 25.15(0.254)             | 40.81(0.149)          | 0.00(0.492)  |
|                       | AH4              | M1                        | 40.59(0.186)          | 0.00(0.718)              | 0.00(0.562)           | 0.00(0.883)  |
|                       |                  | M2                        | 45.68(0.159)          | 0.00(0.583)              | 0.22(0.367)           | 0.00(0.650)  |
|                       | Semantic fluency | M1                        | 55.00(0.064)          | 0.00(0.696)              | 55.18(0.063)          | 51.82(0.081) |
|                       |                  | M2                        | 52.97(0.075)          | 0.00(0.766)              | 57.00(0.054)          | 52.01(0.080) |
|                       | Phonemic fluency | M1                        | 0.00(0.349)           | 71.96(0.059)             | 72.86(0.055)          | 0.00(0.954)  |
|                       |                  | M2                        | 0.00(0.345)           | 61.60(0.107)             | 76.07(0.041)          | 0.00(0.688)  |
|                       | Search speed#    | M1                        | 0.00(0.432)           | 52.72(0.121)             | 74.32(0.020)          | 32.00(0.230) |
|                       |                  | M2                        | 0.00(0.690)           | 58.19(0.091)             | 73.57(0.023)          | 22.52(0.275) |
| Word recall           | M1               | 43.43(0.151)              | 75.93(0.006)          | 49.89(0.112)             | 0.00(0.901)           |              |
|                       | M2               | 40.73(0.167)              | 76.49(0.005)          | 52.38(0.098)             | 0.00(0.793)           |              |

Notes:

$\psi$ Models: (M1) age, sex and SEP adjusted, (M2) M1 + disease adjusted

#Natural log transformed

$\tau^2$   $I^2$  is the percentage of the variation across studies that is due to heterogeneity rather than chance(16). The p-value is for Cochran's Q statistic.

Table 14: Heterogeneity statistics for the observational estimates for the associations between smoking and measures of cognitive decline (Supplementary Table 7)

| Outcome        | Model $\psi$     | $I^2$ (p-value $\tau$ ) |                       |                          |                       |              |
|----------------|------------------|-------------------------|-----------------------|--------------------------|-----------------------|--------------|
|                |                  | Cigarette per day       | Current vs. ex smoker | Current vs. never smoker | Ever vs. never smoker |              |
| Crystallized   | Mill Hill        | M1                      | 0.00(0.899)           | 14.36(0.280)             | 0.00(0.537)           | 0.00(0.790)  |
|                |                  | M2                      | 0.00(0.738)           | 17.00(0.272)             | 0.00(0.417)           | 0.00(0.758)  |
|                | NART             | M1                      | ##                    | 0.00(0.523)              | 0.00(0.857)           | 0.00(0.484)  |
|                |                  | M2                      | ##                    | 0.00(0.613)              | 0.00(0.692)           | 0.00(0.537)  |
| Fluid Measures | AH4              | M1                      | 0.00(0.693)           | 6.08(0.345)              | 73.87(0.022)          | 59.08(0.087) |
|                |                  | M2                      | 0.00(0.586)           | 0.00(0.379)              | 69.77(0.037)          | 38.88(0.195) |
|                | Semantic fluency | M1                      | 62.52(0.069)          | 33.15(0.224)             | 67.20(0.047)          | 31.28(0.233) |
|                |                  | M2                      | 69.96(0.036)          | 22.29(0.276)             | 65.30(0.056)          | 33.50(0.222) |
|                | Phonemic fluency | M1                      | #                     | 0.00(0.741)              | 0.00(0.938)           | 0.00(0.775)  |
|                |                  | M2                      | #                     | 0.00(0.950)              | 0.00(0.871)           | 0.00(0.841)  |
|                | Word recall      | M1                      | 74.55(0.020)          | 0.00(0.824)              | 0.00(0.470)           | 41.37(0.182) |
|                |                  | M2                      | 73.47(0.023)          | 0.00(0.857)              | 0.00(0.478)           | 46.72(0.153) |

*Notes:*

$\psi$ Models: (M1) age, sex and SEP adjusted, (M2) M1 + disease adjusted

#analysis in WHII only

##analysis in CAPS only

$\tau I^2$  is the percentage of the variation across studies that is due to heterogeneity rather than chance(16). The p-value is for Cochran's Q statistic.

Table 15: Heterogeneity statistics for the associations between rs16969968 and outcomes stratified by smoking status (Table 4, main paper)

| Outcome Category             | Outcome                                | I <sup>2</sup> (p-value <sup>a</sup> ) |               |              |
|------------------------------|----------------------------------------|----------------------------------------|---------------|--------------|
|                              |                                        | Current smokers                        | Never smokers | Ever smokers |
| Physical capability          | Grip strength                          | 20.54(0.284)                           | 55.79(0.060)  | 0.00(0.999)  |
|                              | Chair rise speed                       | 47.63(0.126)                           | 49.81(0.113)  | 18.21(0.300) |
|                              | Walk speed                             | 64.53(0.024)                           | 0.00(0.623)   | 0.00(0.643)  |
|                              | TUG speed                              | 0.00(0.455)                            | 0.00(0.681)   | 0.00(0.496)  |
| Cognitive capability         | Mill Hill                              | 0.00(0.684)                            | 0.00(0.619)   | 73.28(0.053) |
|                              | NART                                   | 0.00(0.885)                            | 1.34(0.363)   | 0.00(0.484)  |
|                              | Gf                                     | 0.00(0.803)                            | 0.00(0.897)   | 0.00(0.702)  |
|                              | AH4                                    | 0.00(0.784)                            | 0.00(0.561)   | 0.00(0.511)  |
|                              | Semantic fluency                       | 40.45(0.152)                           | 0.00(0.832)   | 0.00(0.551)  |
|                              | Phonemic fluency                       | 0.00(0.744)                            | 0.00(0.739)   | 86.59(0.006) |
|                              | Search speed#                          | 23.73(0.270)                           | 44.80(0.163)  | 0.00(0.941)  |
|                              | Word recall                            | 0.00(0.509)                            | 26.06(0.255)  | 0.00(0.813)  |
| Physical capability          | Inability to balance on one leg for 5s | 26.86(0.233)                           | 0.00(0.556)   | 0.00(0.987)  |
| Cognitive capability decline | Mill Hill                              | 33.46(0.220)                           | 0.00(0.913)   | 0.00(0.603)  |
|                              | NART                                   | ψψ                                     | 0.00(0.674)   | 0.00(0.681)  |
|                              | AH4                                    | 0.00(0.436)                            | 0.00(0.444)   | 0.00(0.557)  |
|                              | Semantic fluency                       | 44.00(0.168)                           | 75.69(0.016)  | 0.00(0.771)  |
|                              | Phonemic fluency                       | ψ                                      | 22.18(0.257)  | 71.80(0.060) |
|                              | Word recall                            | 0.00(0.819)                            | 0.00(0.486)   | 0.00(0.708)  |

Notes: #Natural log transformed

ψanalysis in WHII only

ψψanalysis in CAPS only

Models adjusted for age and sex.

τ I<sup>2</sup> is the percentage of the variation across studies that is due to heterogeneity rather than chance(16). The p-value is for Cochran's Q statistic.

Table 16: Heterogeneity statistics for the IV estimates (Table 5, main paper)

| Observational association of interest |                  | $I^2$ (p-value <sup>τ</sup> ) |
|---------------------------------------|------------------|-------------------------------|
| Smoking behaviour                     | Outcome          |                               |
| Cigarettes per day                    | Search speed#    | 27.95(0.250)                  |
| Current vs ex smoker                  | Grip strength    | 0.00(0.988)                   |
|                                       | Walk speed       | 0.00(0.959)                   |
|                                       | TUG speed        | 0.00(0.969)                   |
|                                       | Chair rise speed | 0.00(0.895)                   |
|                                       | NART             | 0.00(0.818)                   |
|                                       | Mill Hill        | 0.00(0.887)                   |
|                                       | Gf               | 0.00(0.974)                   |
|                                       | Semantic fluency | 0.00(0.820)                   |
|                                       | AH4              | 0.00(0.979)                   |
|                                       | Word recall      | 0.00(0.973)                   |
|                                       | Search speed#    | 0.00(0.984)                   |

*Notes:*

#Natural log transformed

$\tau I^2$  is the percentage of the variation across studies that is due to heterogeneity rather than chance(16). The p-value is for Cochran's Q statistic.

## Supplementary Figures

Supplementary Figure 1: Meta-analysis of minor allele - ever versus never smoker association

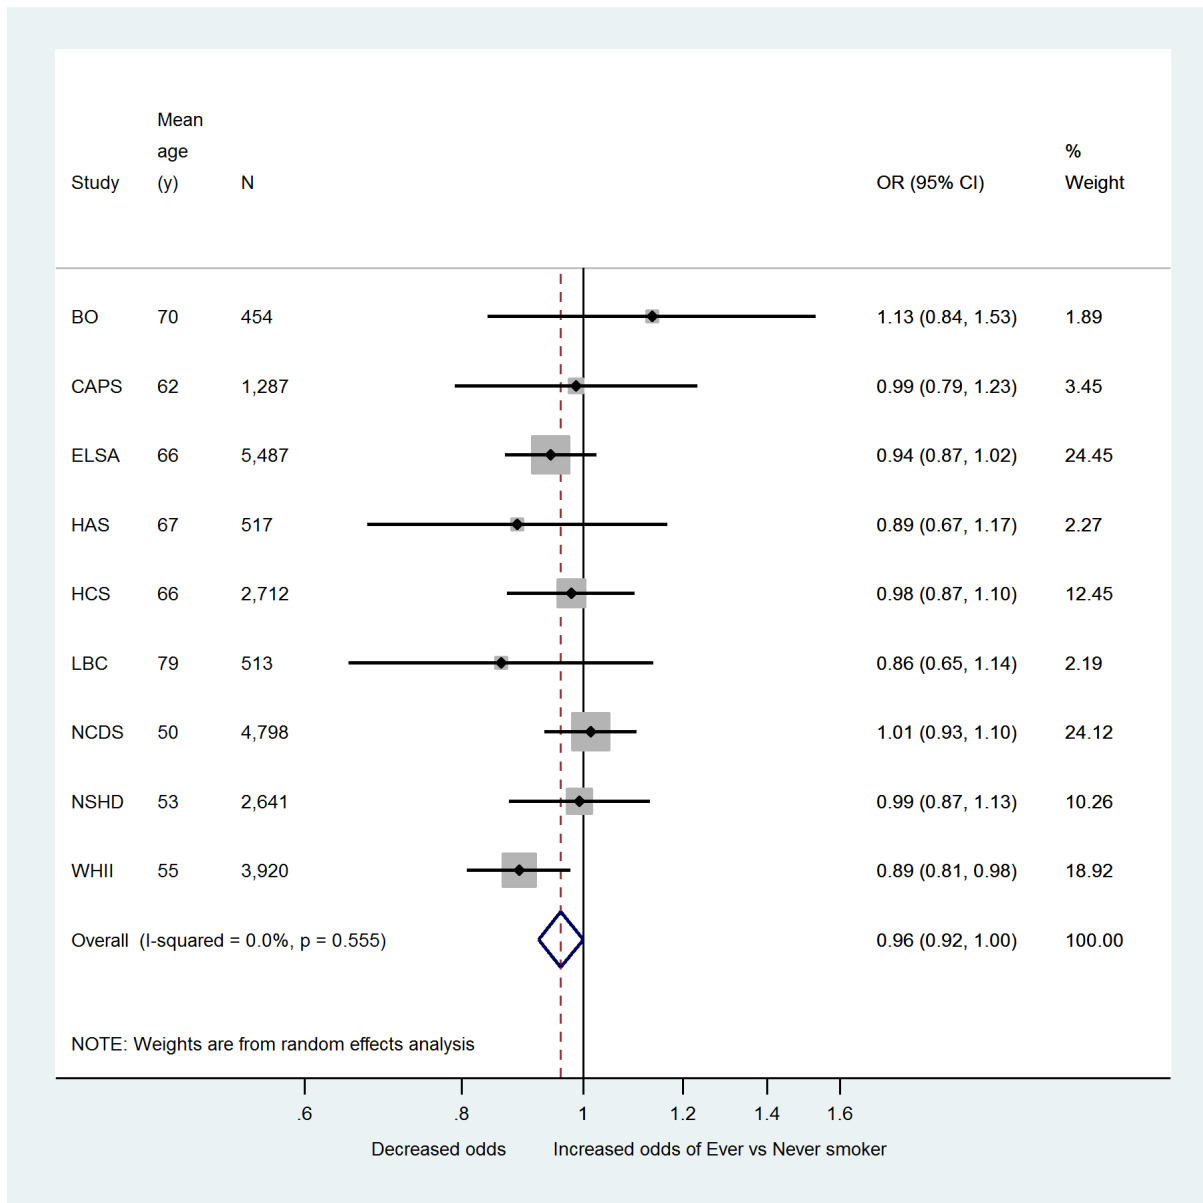

Supplementary Figure 2: Meta-analysis of minor allele - current versus never smoker association

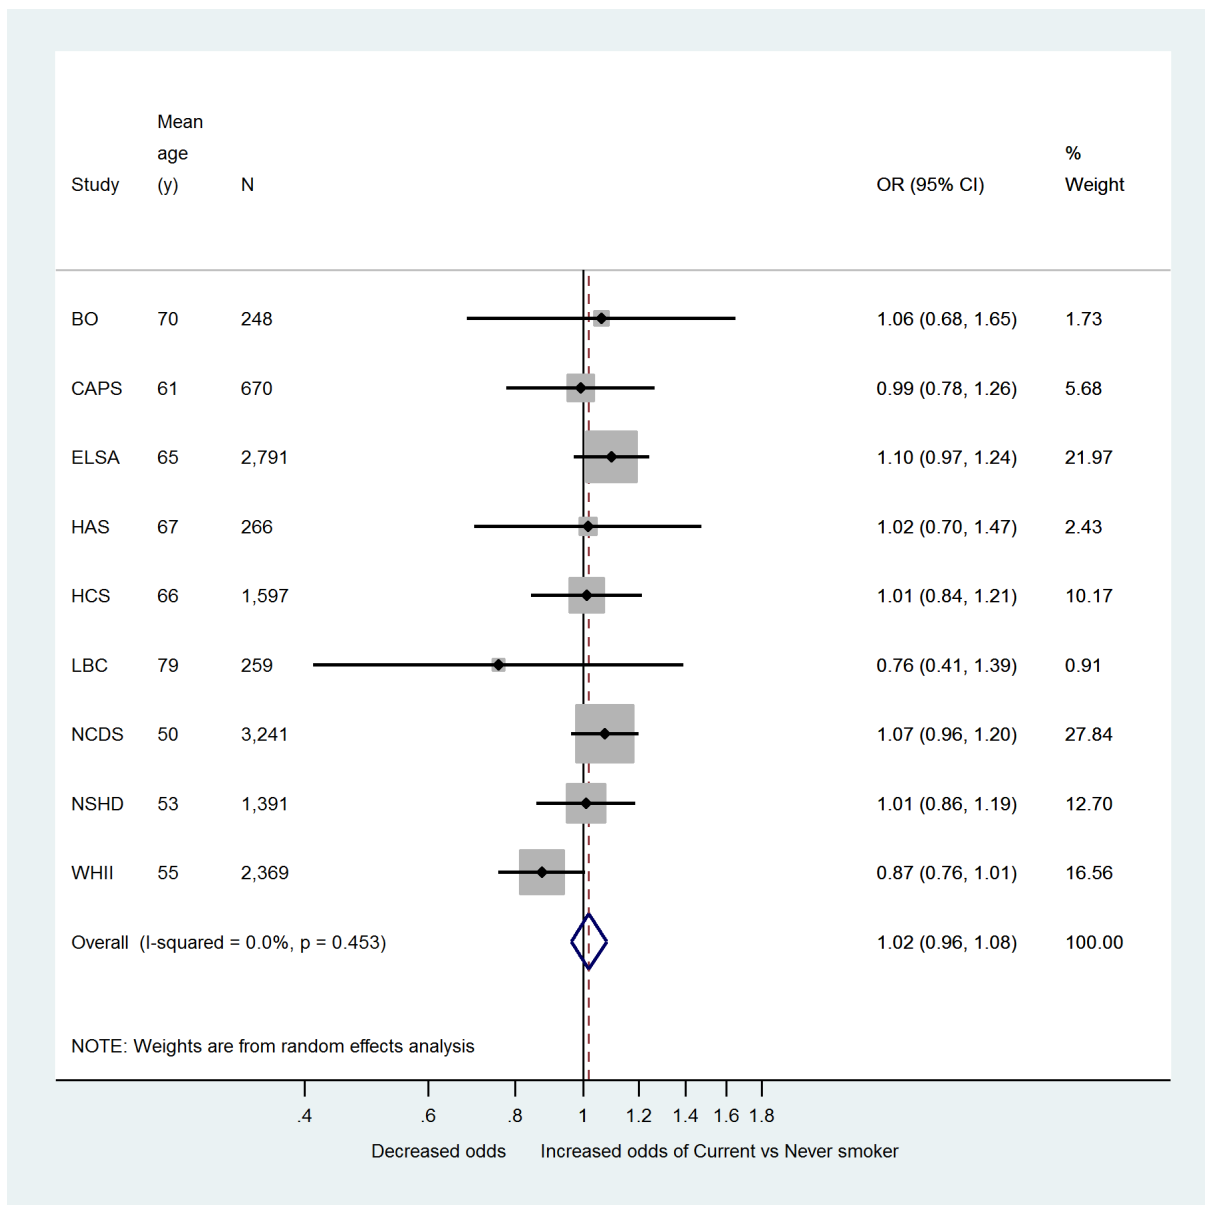

## Cohort and other funding information

### Cohorts

**1958BC (NCDS) WTCCC:** DNA collection was funded by MRC grant G0000934 and cell-line creation by Wellcome Trust grant 068545/Z/02. This study makes use of data generated by the Wellcome Trust Case-Control Consortium. A full list of investigators who contributed to generation of the data is available from the Wellcome Trust Case-Control Consortium website. Funding for the project was provided by the Wellcome Trust under the award 076113. Great Ormond Street Hospital/University College London, Institute of Child Health receives a proportion of funding from the Department of Health's National Institute for Health Research (NIHR) ('Biomedical Research Centres' funding).

**1958BC (NCDS) T1DGC:** DNA collection was funded by MRC grant G0000934 and cell-line creation by Wellcome Trust grant 068545/Z/02. This research used resources provided by the Type 1 Diabetes Genetics Consortium, a collaborative clinical study sponsored by the National Institute of Diabetes and Digestive and Kidney Diseases (NIDDK), National Institute of Allergy and Infectious Diseases, National Human Genome Research Institute, National Institute of Child Health and Human Development, and Juvenile Diabetes Research Foundation International (JDRF) and supported by U01 DK062418. Great Ormond Street Hospital/University College London, Institute of Child Health receives a proportion of funding from the Department of Health's National Institute for Health Research (NIHR) ('Biomedical Research Centres' funding).

**The Whitehall II study** has been supported by grants from the UK: the Medical Research Council (K013351); Economic and Social Research Council; British Heart Foundation; Health and Safety Executive; Department of Health; and from the US: the National Institute on Aging (NIA; grant no. AG13196; R01AG034454); National

Heart Lung and Blood Institute (grant no. HL36310), NIH; and the John D. and Catherine T. MacArthur Foundation Research Networks on Successful Midlife Development and Socio-economic Status and Health.

**Samples from the English Longitudinal Study of Ageing (ELSA) DNA Repository** (EDNAR), received support under a grant (AG1764406S1) awarded by the NIA. ELSA was developed by a team of researchers based at the National Centre for Social Research, University College London and the Institute of Fiscal Studies. The data were collected by the National Centre for Social Research.

**BO:** The Wellcome Trust funded R.M.M. to undertake the clinical third wave of follow-up of Boyd Orr (2002-03) as part of a research training fellowship in clinical epidemiology (grant GR063779FR).

**The LBC1921** was funded by the Biotechnology and Biological Sciences Research Council (15/SAG09977), the Chief Scientist Office of the Scottish Executive Health Department (CZB/4/505, ETM/55, CZH/4/213, CZG/3/2/79), a Royal Society-Wolfson Research Merit Award to Ian Deary. The work was undertaken by The University of Edinburgh Centre for Cognitive Ageing and Cognitive Epidemiology, part of the cross council Lifelong Health and Wellbeing Initiative (MR/K026992/1). Funding from the Biotechnology and Biological Sciences Research Council (BBSRC) and Medical Research Council (MRC) is gratefully acknowledged.

**The MRC National Survey of Health and Development (NSHD)** is supported by the UK Medical Research Council [MC\_UU\_12019/1, MC\_UU12019/4]. Bona fide researchers can



apply to access the NSHD data via a standard application procedure (further details available at: <http://www.nshd.mrc.ac.uk/data.aspx>).

**The CaPS** was conducted by the former MRC Epidemiology Unit (South Wales) and funded by the Medical Research Council of the United Kingdom. The Department of Social and Community Medicine, University of Bristol now maintains the archive.

**HCS/HAS:** The Hertfordshire studies were supported by the Medical Research Council, NIHR Southampton BRC, NIHR Musculoskeletal BRU (Oxford), Arthritis Research UK, International Osteoporosis Foundation, British Heart Foundation, and EU Framework 7 programme.

### Researchers

TLN is the recipient of an MRC PhD studentship in the Bristol Centre for Systems Biomedicine (BCSBmed) MRC doctoral training centre.

RC and DK are funded by the Medical Research Council  
[MC\_UU\_12019/1,MC\_UU\_12019/4].

Mika Kivimaki is supported by an Economic and Social Research Council professorial fellowship.

The NIHR Bristol Nutrition Biomedical Research Unit is funded by the National Institute for Health Research (NIHR) and is a partnership between the University Hospitals Bristol NHS Foundation Trust and the University of Bristol. The funders had no role in the conduct or reporting of the study.

Ian Deary and John Starr are supported by the Centre for Cognitive Ageing and Cognitive Epidemiology, which is funded by the Biotechnology Sciences Research Council and the Medical Research Council and the University of Edinburgh as part of the cross council Lifelong Health and Wellbeing initiative (MR/K026992/1).

### Cohort Ethical Approval

**NCDS:** Ethical approval for the 1958 birth cohort 45y survey (when DNA was collected) was obtained from South East Multi-centre Research Ethics Committee (ref. 01/1/44) and the Joint UCL/UCLH Committees on the Ethics of Human Research (Committee A) Ref: 08/H0714/40.

**NSHD:** Ethical approval for the NSHD data collection at 53 years was approved by the North Thames Multi-Centre Research Ethics Committee (ref. MREC 98/1/121). At 60–64 years ethical approval was obtained from the Central Manchester Local Research Ethics Committee (ref. 07/H1008/245) and the Scotland A Research Ethics Committee (ref. 08/MRE00/12).

Written informed consent was obtained from study members at each stage of data collection.

**English Longitudinal Study of Ageing (ELSA):** ELSA has been approved by the National Research Ethics Service and all participants have given informed consent.

**Whitehall II:** All participants provided written consent and the University College London ethics committee approved the study.

**BO:** Ethical approval for the clinical third wave of follow-up of Boyd Orr (2002-03) was obtained from Multi-centre Research Ethics Committee Scotland. All participants gave informed consent.

**LBC1921:** Ethical approval for the Lothian Birth Cohort 1921 study was given by the Lothian Research Ethics Committee.

**CAPS:** Ethical approval for genotypic analyses was provided by South East Wales Local Research Ethics Committee Panel B (05/WSE02/131). The original CaPS project received ethical approval from the former South Glamorgan Area Health Authority.

**HCS/HAS:** Ethical approval for the Hertfordshire studies was obtained from the Hertfordshire Local Research Ethics Committee.

## Supplementary References

1. Martin RM, Gunnell D, Pemberton J, Frankel S, Davey Smith G. Cohort Profile: The Boyd Orr cohort—an historical cohort study based on the 65 year follow-up of the Carnegie Survey of Diet and Health (1937–39). *International Journal of Epidemiology*. 2005;**34**:742-749.
2. Steptoe A, Breeze E, Banks J, Nazroo J. Cohort Profile: The English Longitudinal Study of Ageing. *International Journal of Epidemiology*. 2013;**42**:1640-1648.
3. Syddall HE, Simmonds SJ, Martin HJ, Watson C, Dennison EM, Cooper C, *et al*. Cohort profile: The Hertfordshire Ageing Study (HAS). *International Journal of Epidemiology*. 2010;**39**:36-43.
4. Syddall H, Aihie Sayer A, Dennison E, Martin H, Barker D, Cooper C, *et al*. Cohort Profile: The Hertfordshire Cohort Study. *International Journal of Epidemiology*. 2005;**34**:1234-1242.
5. Deary IJ, Gow AJ, Pattie A, Starr JM. Cohort Profile: The Lothian Birth Cohorts of 1921 and 1936. *International Journal of Epidemiology*. 2012;**41**:1576-1584.
6. Power C, Elliott J. Cohort profile: 1958 British birth cohort (National Child Development Study). *International Journal of Epidemiology*. 2006;**35**:34-41.
7. Kuh D, Pierce M, Adams J, Deanfield J, Ekelund U, Friberg P, *et al*. Cohort Profile: Updating the cohort profile for the MRC National Survey of Health and Development: a new clinic-based data collection for ageing research. *International Journal of Epidemiology*. 2011;**40**:e1-e9.
8. Marmot M, Brunner E. Cohort Profile: The Whitehall II study. *International Journal of Epidemiology*. 2005;**34**:251-256.
9. Cooper R, Hardy R, Aihie Sayer A, Ben-Shlomo Y, Birnie K, Cooper C, *et al*. Age and Gender Differences in Physical Capability Levels from Mid-Life Onwards: The Harmonisation and Meta-Analysis of Data from Eight UK Cohort Studies. *PLoS ONE*. 2011;**6**:e27899.
10. Nelson HE, Willison JR. National Adult Reading Test (NART) test manual (Part II). Windsor, England: NFER-NELSON; 1991.
11. Raven JC. Guide to using the Mill Hill vocabulary test with progressive matrices. London, England: HK Lewis; 1965.
12. Heim AW. AH4 Group Test of General Intelligence. Windsor: The NFER-Nelson Publishing Company; 1970.
13. Wechsler D. Wechsler Memory Scale-Revised. New York, NY: Psychological Corp; 1987.
14. Raven JC, Court JH, Raven J. Manual for Raven's Progressive Matrices and Vocabulary Scales. London, England: H. K. Lewis; 1977.
15. Barrett JC, Clayton DG, Concannon P, Akolkar B, Cooper JD, Erlich HA, *et al*. Genome-wide association study and meta-analysis find that over 40 loci affect risk of type 1 diabetes. *Nat Genet*. 2009;**41**:703-707.
16. Higgins JPT, Thompson SG. Quantifying heterogeneity in a meta-analysis. *Statistics in Medicine*. 2002;**21**:1539-1558.
